# Supplementary material for: Structure basis rational engineering of glyceraldehyde-3-phosphate dehydrogenase from Corynebacterium glutamicum for dual NAD/NADP cofactor specificity
Source: Research Square preprint supplement (doi:10.21203/rs.3.rs-2763403/v1), 2023-04-27
Supplement: Supplementary file 1 [file a7992816e58860696ed5a170.xlsx]

## Sheet: Supplementary_Data_1
Enzyme	Wild-type						Enzyme	Wild-type
Target	Glyceraldehyde-3-phosphate (G3P) substrate						Target	NAD cofactor
Cofactor	NAD
G3P conc. (mM)							NAD conc. (mM)
0.1	0.00033	0.00031	0.00039				0.01	0.001	0.00115	0.00109
0.2	0.00111	0.00082	0.00089				0.02	0.00194	0.0018	0.00174
0.5	0.00146	0.00172	0.00186				0.05	0.0056	0.00347	0.00377
1	0.00387	0.00181	0.00308				0.1	0.00584	0.00488	0.00493
2	0.0049	0.0054	0.00574				0.2	0.00563	0.00631	0.00652
5	0.00824	0.00885	0.00912				0.5	0.00732	0.00768	0.00825
10	0.00872	0.00898	0.00948				1	0.00705	0.00857	0.00796
							2	0.00698	0.0082	0.00858
							5	0.00738	0.00833	0.00822
Enzyme	L36S						Enzyme	L36S						Enzyme	Wild-type					Enzyme	Wild-type
Target	Glyceraldehyde-3-phosphate (G3P) substrate						Target	Glyceraldehyde-3-phosphate (G3P) substrate						Target	NAD cofactor					Target	NADP cofactor
Cofactor	NAD						Cofactor	NADP
G3P conc. (mM)							G3P conc. (mM)							NAD conc. (mM)						NAD conc. (mM)
0.1	0.00075	0.0006					0.1	0.00183	0.0017					0.05	0.00232	0.0016				0.02	0.00024	0
0.2	0.00111	0.0012					0.2	0.00299	0.00303					0.1	0.00373	0.00316				0.05	0.000555556	0.00131
0.5	0.00313	0.00294					0.5	0.00698	0.00628					0.2	0.00519	0.00484				0.1	0.00112	0.0016
1	0.00467	0.00485					1	0.00911	0.00883					0.5	0.00819	0.00651				0.2	0.00225	0.00227
2	0.00849	0.00828					2	0.01058	0.01074					1	0.00976	0.00956				0.5	0.00496	0.00392
5	0.01294	0.01099					5	0.01176	0.01011					2	0.01151	0.00988				1	0.00667	0.00673
10	0.01328	0.01147												5	0.01125	0.01084				2	0.00885	0.00969
																				5	0.01105	0.01247
Enzyme	L36S/T37K						Enzyme	L36S/T37K						Enzyme	L36S/T37K					Enzyme	L36S/T37K
Target	Glyceraldehyde-3-phosphate (G3P) substrate						Target	Glyceraldehyde-3-phosphate (G3P) substrate						Target	NAD cofactor					Target	NADP cofactor
Cofactor	NAD						Cofactor	NADP
G3P conc. (mM)							G3P conc. (mM)							NAD conc. (mM)						NAD conc. (mM)
0.1	0.00115	0.00114					0.1	0.00106	0.00093					0.01	0.00078	0.00094				0.01	0.00013	0.00013
0.2	0.00232	0.00274					0.2	0.00145	0.00145					0.02	0.00092	0.00153				0.02	8e-05	0.00011
0.5	0.0055	0.00581					0.5	0.00257	0.00252					0.05	0.00291	0.00299				0.05	0.00021	0.00015
1	0.00952	0.011					1	0.00321	0.0036					0.1	0.00488	0.00487				0.1	0.00019	0.00032
2	0.01712	0.01786					2	0.0043	0.0034					0.2	0.00813	0.00963				0.2	0.00061	0.00044
5	0.02676	0.02769					5	0.00425	0.00504					0.5	0.01477	0.01568				0.5	0.00109	0.00116
10	0.0289	0.03004												1	0.01987	0.02051				1	0.00194	0.00218
														2	0.0233	0.02479				2	0.00289	0.00311
														5	0.02835	0.02734				5	0.00514	0.00469
														10	0.02932	0.02932				10	0.00591	0.00591
Enzyme	L36S/T37K/F100V						Enzyme	L36S/T37K/F100V						Enzyme	L36S/T37K/F100V					Enzyme	L36S/T37K/F100V
Target	Glyceraldehyde-3-phosphate (G3P) substrate						Target	Glyceraldehyde-3-phosphate (G3P) substrate						Target	NAD cofactor					Target	NADP cofactor
Cofactor	NAD						Cofactor	NADP
G3P conc. (mM)							G3P conc. (mM)							NAD conc. (mM)						NAD conc. (mM)
0.1	0.00098	0.0012					0.1	0.0013	0.00144					0.01	0.00133	0.00119				0.01	0.00027	0.00026
0.2	0.00223	0.00195					0.2	0.00228	0.00276					0.02	0.00201	0.00203				0.02	0.0002	0.00029
0.5	0.00545	0.0055					0.5	0.00443	0.00559					0.05	0.00481	0.00466				0.05	0.00071	0.00058
1	0.00875	0.01469					1	0.00637	0.00606					0.1	0.00725	0.00699				0.1	0.00118	0.0008
2	0.0164	0.01756					2	0.00898	0.01018					0.2	0.00942	0.01004				0.2	0.00206	0.00245
5	0.02516	0.02631					5	0.01041	0.01214					0.5	0.0172	0.01722				0.5	0.00452	0.00418
10	0.02983	0.02915												1	0.02005	0.02041				1	0.00601	0.00641
														2	0.02331	0.02354				2	0.00799	0.00868
														5	0.02412	0.02477				5	0.01243	0.01079
Enzyme	L36S/T37K/S192S						Enzyme	L36S/T37K/S192S						Enzyme	L36S/T37K/S192S					Enzyme	L36S/T37K/S192S
Target	Glyceraldehyde-3-phosphate (G3P) substrate						Target	Glyceraldehyde-3-phosphate (G3P) substrate						Target	NAD cofactor					Target	NADP cofactor
Cofactor	NAD						Cofactor	NADP
G3P conc. (mM)							G3P conc. (mM)							NAD conc. (mM)						NAD conc. (mM)
0.1	0.00135	0.00149					0.1	0.00117	0.00098					0.01	0.00079	0.00079				0.01	0.00049	0.00049
0.2	0.00325	0.00334					0.2	0.00164	0.00189					0.02	0.00106	0.0016				0.02	0.00081	0.00087
0.5	0.00641	0.005					0.5	0.00378	0.00409					0.05	0.00294	0.00233				0.05	0.00141	0.00188
1	0.01019	0.01104					1	0.00595	0.00529					0.1	0.0045	0.00426				0.1	0.00244	0.00286
2	0.01523	0.01776					2	0.00819	0.00758					0.2	0.00711	0.00701				0.2	0.00342	0.00398
5	0.02303	0.02667					5	0.01005	0.00985					0.5	0.01262	0.01285				0.5	0.00596	0.00599
10	0.02759	0.02695												1	0.01722	0.01757				1	0.00722	0.00771
														2	0.02042	0.01843				2	0.00865	0.00752
														5	0.0215	0.0227				5	0.00806	0.00829
														10	0.02271	0.02271
Enzyme	L36S/T37K/F100V/S192S						Enzyme	L36S/T37K/F100V/S192S						Enzyme	L36S/T37K/F100V/S192S					Enzyme	L36S/T37K/F100V/S192S
Target	Glyceraldehyde-3-phosphate (G3P) substrate						Target	Glyceraldehyde-3-phosphate (G3P) substrate						Target	NAD cofactor					Target	NADP cofactor
Cofactor	NAD						Cofactor	NADP
G3P conc. (mM)							G3P conc. (mM)							NAD conc. (mM)						NAD conc. (mM)
0.1	0.00114	0.00147					0.1	0.00061	0.00022					0.01	0.00098					0.01	0.00106	0.00106
0.2	0.00203	0.00271					0.2	0.00126	0.00085					0.02	0.00176	0.00188				0.02	0.00099	0.00118
0.5	0.00405	0.00585					0.5	0.00206	0.00187					0.05	0.00435	0.00403				0.05	0.00201	0.00177
1	0.00868	0.01115					1	0.00333	0.00289					0.1	0.00608	0.0058				0.1	0.00253	0.00266
2	0.01383	0.01468					2	0.00359	0.0042					0.2	0.00885	0.00889				0.2	0.0035	0.00376
5	0.01876	0.02188					5	0.00519	0.00489					0.5	0.01317	0.01357				0.5	0.00421	0.00478
10	0.02232	0.02348												1	0.01562	0.01735				1	0.00489	0.00537
														2	0.01813	0.01697				2	0.00593	0.00489
														5	0.01758	0.01808				5	0.00539	0.00559
